# Supplementary figures and images for: Raw product of rare-earth ore works as a high-k gate insulator for low-voltage operable organic field-effect transistors
Source: Royal Society of Chemistry journal article supplement (doi:10.1039/c6ra24071b), 2016-01-01

### Electronic supporting information

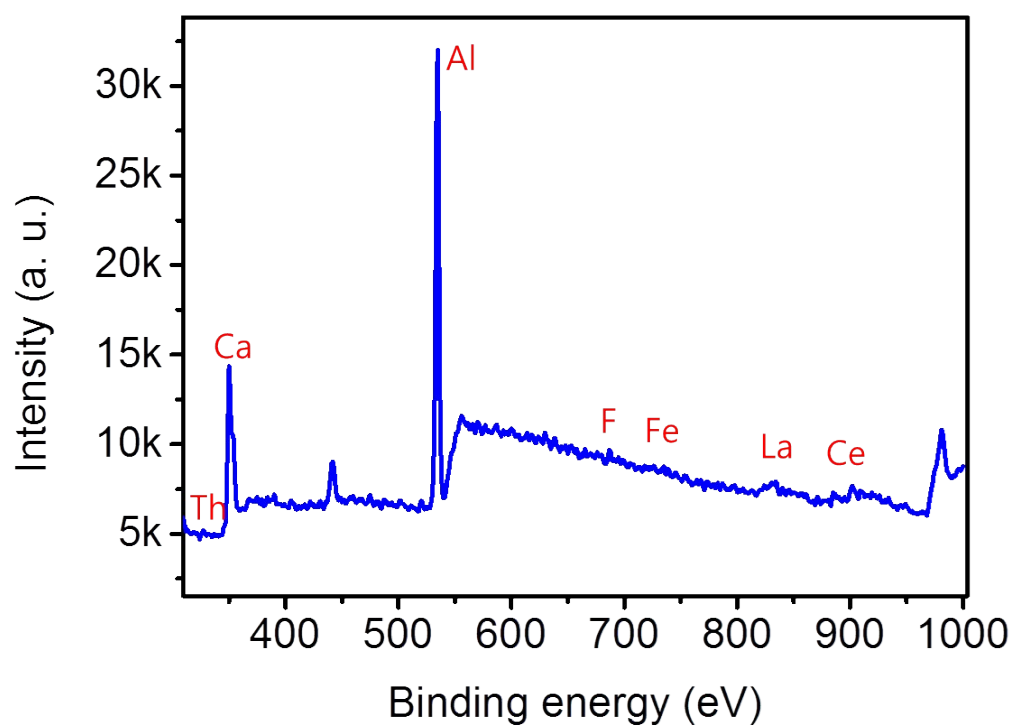

ESI-1. XPS analysis of the 50 nm thin film.

Supplement: c6ra24071b1.pdf [file c6ra24071b1.pdf]
